# Supplementary material for: Genetic Variation in the TAS2R38 Bitter Taste Receptor and Smoking Behaviors
Source: PLoS One. 2016 Oct 6;11(10):e0164157. doi: 10.1371/journal.pone.0164157 (PMC5053502; doi:10.1371/journal.pone.0164157)
Supplement: S1 File — Table A. Characteristics of the Georgia, DHS and Biobank participants by smoking status. Table B. TAS2R38 Haplotype Frequencies in the Study Cohorts. (DOCX) [file pone.0164157.s001.docx]

**Supporting Information File S1 for:**

**Genetic Variation in the *TAS2R38* Bitter Taste Receptor and Smoking Behaviors**

Davide S. Risso1,2, Julia Kozlitina3, Eduardo Sainz1, Joanne Gutierrez1, Stephen Wooding4, Betelihem Getachew5,Donata Luiselli2, Carla J. Berg5, Dennis Drayna1*

1Laboratory of Communication Disorders, National Institute on Deafness and Other Communication Disorders, National Institutes of Health, Bethesda, Maryland

2Laboratory of Molecular Anthropology and Centre for Genome Biology, Department of Biological, Geological, and Environmental Sciences, University of Bologna, Bologna, Italy

3McDermott Center for Human Growth and Development, University of Texas Southwestern Medical Center, Dallas, Texas

4Health Sciences Research Institute, University of California, Merced

5Department of Behavioral Sciences and Health Education, Emory University Woodruff Health Sciences Center, Atlanta, GA

* Corresponding author

E-mail: [drayna@nidcd.nih.gov](mailto:drayna@nidcd.nih.gov)

This S1 file includes:

Table A

Table B

**S1- Table A.** Characteristics of the Georgia, DHS and Biobank participants by smoking status.

| **Characteristic** | **Non-smokers** | **Smokers** | **P-value** |
| --- | --- | --- | --- |
| **Georgia cohort** |  |  |  |
| N | 114 | 123 |  |
| Age, years, mean (SD) | 21.2 (1.9) | 20.6 (1.8) | 0.85 |
| Female, N (%) | 54 (47.4%) | 67 (54.5%) | 0.72 |
|  |  |  |  |
| **DHS African American** |  |  |  |
| N | 1640 | 723 |  |
| Age, years, mean (SD) | 48.4 (11.6) | 47.6 (10.4) | 0.13 |
| Female, N (%) | 1053 (64.2%) | 357 (49.4%) | <0.001 |
|  |  |  |  |
| **DHS European American** |  |  |  |
| N | 1037 | 316 |  |
| Age, years, mean (SD) | 51.2 (11.3) | 46.4 (10.2) | <0.001 |
| Female, N (%) | 566 (54.6%) | 158 (50.0%) | 0.17 |
|  |  |  |  |
| **Biobank African American** |  |  |  |
| N | 3447 | 1526 |  |
| Age, years, mean (SD) | 45.3 (15.1) | 43.8 (13.4) | 0.001 |
| Female, N (%) | 2449 (71.0%) | 789 (51.7%) | <0.001 |

**S1- Table B.** *TAS2R38* Haplotype Frequencies in the Study Cohorts.

**
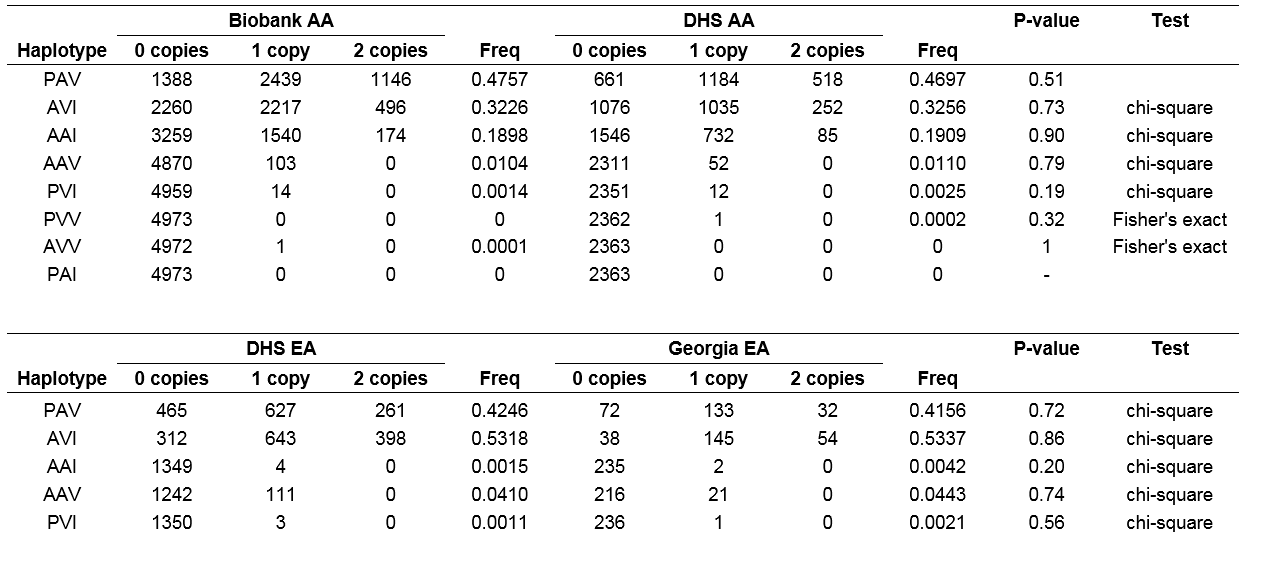
**
